# Supplementary material for: Sex and APOE ε4 genotype modify the Alzheimer’s disease serum metabolome
Source: PubMed Central journal article supplement (PMC7052223; doi:10.1038/s41467-020-14959-w), 2020-03-02
Supplement: 41467_2020_14959_MOESM6_ESM.pdf [file 41467_2020_14959_MOESM6_ESM.pdf]

# Supplementary Data 1 - Bootstrapping analysis

for: Sex and APOE  $\epsilon 4$  genotype modify the Alzheimer's disease serum metabolome

*Matthias Arnold, Kwangsik Nho, Alexandra Kueider-Paisley, Tyler Massaro, Kevin Huynh, Barbara Brauner, Siamak MahmoudianDehkordi, Gregory Louie, M. Arthur Moseley, J. Will Thompson, Lisa St John Williams, Jessica D. Tenenbaum, Colette Blach, Rui Chang, Roberta D. Brinton, Rebecca Baillie, Xianlin Han, John Q. Trojanowski, Leslie M. Shaw, Ralph Martins, Michael W. Weiner, Eugenia Trushina, Jon B. Toledo, Peter J. Meikle, David A. Bennett, Jan Krumsiek, P. Murali Doraiswamy, Andrew J. Saykin, Rima Kaddurah-Daouk, and Gabi Kastenmüller for the Alzheimer's Disease Neuroimaging Initiative and the Alzheimer's Disease Metabolomics Consortium*

## Contents

|                                                             |    |
|-------------------------------------------------------------|----|
| Sex-stratified analysis                                     | 2  |
| Pathological CSF A $\beta_{1-42}$ . . . . .                 | 2  |
| CSF p-tau . . . . .                                         | 4  |
| FDG-PET . . . . .                                           | 9  |
| APOE $\epsilon 4$ status-stratified analyses                | 13 |
| Pathological CSF A $\beta_{1-42}$ . . . . .                 | 13 |
| FDG-PET . . . . .                                           | 16 |
| 2-fold stratified analyses (sex * APOE $\epsilon 4$ status) | 21 |
| Pathological CSF A $\beta_{1-42}$ . . . . .                 | 21 |
| CSF p-tau . . . . .                                         | 22 |
| FDG-PET . . . . .                                           | 23 |

---

$\beta_0$ : original beta (as reported in manuscript);  $P_0$ : original P-value; bias ( $\beta_0$ ): bias of the original beta as determined by 1000 bootstraps;  $\beta_{boot}$ : histogram of  $\beta$ -estimates across 1000 bootstraps, with  $\beta_0$  indicated as dashed line and 95% bootstrap-t confidence intervals given by grey lines;  $P_N$ : P-value of the Shapiro-Wilk test for normality;  $\mu(\beta)_{boot}$ : mean  $\beta$  across the 1000 bootstraps;  $\mu(SE)_{boot}$ : mean of the standard error of  $\beta$  across the 1000 bootstraps;  $P_{boot}$ : two-tailed P-value of the standard normal distribution for  $-\text{abs}(\mu(\beta)_{boot} / \mu(SE)_{boot})$ ; %  $P_{bonf.sign.}$ : fraction of bootstraps yielding a Bonferroni-significant P-value ( $P \leq 9.09 \times 10^{-4}$ ); %  $P_{nom.sign.}$ : fraction of bootstraps yielding a nominally significant P-value ( $P \leq 0.05$ );  $\Delta \text{Sex} / \Delta \text{APOE } \epsilon 4 \pm$ : statistics for heterogeneity ( $P_{boot}$ : two-tailed P-value of the standard normal distribution for the mean heterogeneity estimate; %  $P_{nom.sign.}$ : fraction of bootstraps yielding a nominally significant P-value;  $I^2_{boot}$ :  $I^2$  calculated for the mean heterogeneity estimate; %  $I^2_{boot} = 0$ : fraction of bootstraps yielding an  $I^2$  estimate of exactly zero)

# Sex-stratified analysis

## Pathological CSF $A\beta_{1-42}$

| metabolite   | statistic           | pooled   | males             | females                            |
|--------------|---------------------|----------|-------------------|------------------------------------|
|              | $\beta_0$           | 0.283    | 0.282             | 0.299                              |
|              | $P_0$               | 0.000258 | 0.00596           | 0.0133                             |
|              | bias ( $\beta_0$ )  | 0.00486  | 0.00453           | 0.0105                             |
| PC ae C44:6  | $\beta_{boot}$      |          |                   |                                    |
|              | $\mu(\beta)_{boot}$ | 0.288    | 0.286             | 0.309                              |
|              | $\mu(SE)_{boot}$    | 0.0783   | 0.104             | 0.123                              |
|              | $P_{boot}$          | 0.000233 | 0.006             | 0.012                              |
|              | % $P_{bonf.sign.}$  | 63.9     | 27.5              | 20                                 |
|              | % $P_{nom.sign.}$   | 95.6     | 79.4              | 71                                 |
| $\Delta$ Sex | $P_{boot}$          |          | % $P_{nom.sign.}$ | $I^2_{boot}$ (% $I^2_{boot} = 0$ ) |
|              | 0.891               |          | 4.8               | 0 (68)                             |

| metabolite   | statistic           | pooled   | males             | females                            |
|--------------|---------------------|----------|-------------------|------------------------------------|
|              | $\beta_0$           | 0.265    | 0.274             | 0.255                              |
|              | $P_0$               | 0.000457 | 0.00629           | 0.0307                             |
|              | bias ( $\beta_0$ )  | 0.00664  | 0.00383           | 0.0136                             |
| PC ae C44:4  | $\beta_{boot}$      |          |                   |                                    |
|              | $\mu(\beta)_{boot}$ | 0.272    | 0.277             | 0.269                              |
|              | $\mu(SE)_{boot}$    | 0.0765   | 0.102             | 0.121                              |
|              | $P_{boot}$          | 0.000378 | 0.00638           | 0.0259                             |
|              | % $P_{bonf.sign.}$  | 60.8     | 25                | 11.2                               |
|              | % $P_{nom.sign.}$   | 94.8     | 78.6              | 62.3                               |
| $\Delta$ Sex | $P_{boot}$          |          | % $P_{nom.sign.}$ | $I^2_{boot}$ (% $I^2_{boot} = 0$ ) |
|              | 0.955               |          | 4.7               | 0 (70)                             |

| metabolite  | statistic           | pooled     | males             | females                            |  |
|-------------|---------------------|------------|-------------------|------------------------------------|--|
|             | $\beta_0$           | 0.26       | 0.294             | 0.214                              |  |
|             | $P_0$               | 0.000523   | 0.00326           | 0.0638                             |  |
|             | bias ( $\beta_0$ )  | 0.00113    | 0.00458           | 0.000925                           |  |
| PC ae C44:5 | $\beta_{boot}$      |            |                   |                                    |  |
|             | $\mu(\beta)_{boot}$ | 0.261      | 0.299             | 0.215                              |  |
|             | $\mu(SE)_{boot}$    | 0.0758     | 0.102             | 0.118                              |  |
|             | $P_{boot}$          | 0.000567   | 0.00337           | 0.0672                             |  |
|             | % $P_{bonf.sign.}$  | 55.4       | 34.4              | 5                                  |  |
|             | % $P_{nom.sign.}$   | 93.4       | 85.6              | 46.5                               |  |
|             | $\Delta$ Sex        | $P_{boot}$ | % $P_{nom.sign.}$ | $I^2_{boot}$ (% $I^2_{boot} = 0$ ) |  |
|             |                     | 0.591      | 8.8               | 0 (64)                             |  |

| metabolite | statistic           | pooled     | males             | females                            |  |
|------------|---------------------|------------|-------------------|------------------------------------|--|
|            | $\beta_0$           | 0.207      | 0.372             | 0.0699                             |  |
|            | $P_0$               | 0.00672    | 0.000883          | 0.517                              |  |
|            | bias ( $\beta_0$ )  | 0.00311    | 0.00544           | 0.00391                            |  |
| Threonine  | $\beta_{boot}$      |            |                   |                                    |  |
|            | $\mu(\beta)_{boot}$ | 0.21       | 0.377             | 0.0738                             |  |
|            | $\mu(SE)_{boot}$    | 0.077      | 0.114             | 0.11                               |  |
|            | $P_{boot}$          | 0.00642    | 0.000892          | 0.502                              |  |
|            | % $P_{bonf.sign.}$  | 27.1       | 50.9              | 0.3                                |  |
|            | % $P_{nom.sign.}$   | 79.1       | 92.2              | 9.6                                |  |
|            | $\Delta$ Sex        | $P_{boot}$ | % $P_{nom.sign.}$ | $I^2_{boot}$ (% $I^2_{boot} = 0$ ) |  |
|            |                     | 0.0553     | 47.8              | 47.8 (19)                          |  |

| metabolite | statistic           | pooled     | males             | females                            |
|------------|---------------------|------------|-------------------|------------------------------------|
|            | $\beta_0$           | -0.134     | 0.0319            | -0.299                             |
|            | $P_0$               | 0.105      | 0.78              | 0.015                              |
|            | bias ( $\beta_0$ )  | -0.00348   | -0.00022          | -0.00717                           |
| Valine     | $\beta_{boot}$      |            |                   |                                    |
|            | $\mu(\beta)_{boot}$ | -0.137     | 0.0317            | -0.306                             |
|            | $\mu(SE)_{boot}$    | 0.0833     | 0.116             | 0.125                              |
|            | $P_{boot}$          | 0.0995     | 0.785             | 0.0144                             |
|            | % $P_{bonf.sign.}$  | 4.3        | 0                 | 19.9                               |
|            | % $P_{nom.sign.}$   | 39.8       | 5                 | 70.3                               |
|            | $\Delta$ Sex        | $P_{boot}$ | % $P_{nom.sign.}$ | $I^2_{boot}$ (% $I^2_{boot} = 0$ ) |
|            |                     | 0.0483     | 49.9              | 49.4 (18)                          |

## CSF p-tau

| metabolite | statistic           | pooled     | males             | females                            |
|------------|---------------------|------------|-------------------|------------------------------------|
|            | $\beta_0$           | 0.0839     | 0.0141            | 0.144                              |
|            | $P_0$               | 0.00458    | 0.734             | 0.000607                           |
|            | bias ( $\beta_0$ )  | 0.000206   | -0.00031          | 0.000518                           |
| C10        | $\beta_{boot}$      |            |                   |                                    |
|            | $\mu(\beta)_{boot}$ | 0.0841     | 0.0138            | 0.144                              |
|            | $\mu(SE)_{boot}$    | 0.0295     | 0.0416            | 0.0417                             |
|            | $P_{boot}$          | 0.00438    | 0.74              | 0.000545                           |
|            | % $P_{bonf.sign.}$  | 33.7       | 0.2               | 54.8                               |
|            | % $P_{nom.sign.}$   | 80.1       | 8.9               | 92.5                               |
|            | $\Delta$ Sex        | $P_{boot}$ | % $P_{nom.sign.}$ | $I^2_{boot}$ (% $I^2_{boot} = 0$ ) |
|            |                     | 0.0267     | 59.6              | 54.9 (12)                          |

| metabolite    | statistic           | pooled     | males             | females                            |
|---------------|---------------------|------------|-------------------|------------------------------------|
|               | $\beta_0$           | 0.103      | 0.0116            | 0.205                              |
|               | $P_0$               | 0.0235     | 0.852             | 0.00227                            |
|               | bias ( $\beta_0$ )  | -0.000864  | 0.00161           | -0.00285                           |
| C5-DC (C6-OH) | $\beta_{boot}$      |            |                   |                                    |
|               | $\mu(\beta)_{boot}$ | 0.102      | 0.0132            | 0.202                              |
|               | $\mu(SE)_{boot}$    | 0.0454     | 0.0626            | 0.0668                             |
|               | $P_{boot}$          | 0.0248     | 0.832             | 0.00253                            |
|               | % $P_{bonf.sign.}$  | 13.4       | 0.1               | 36.6                               |
|               | % $P_{nom.sign.}$   | 63.1       | 4.7               | 86.3                               |
|               | $\Delta$ Sex        | $P_{boot}$ | % $P_{nom.sign.}$ | $I^2_{boot}$ (% $I^2_{boot} = 0$ ) |
|               |                     | 0.0392     | 53.9              | 51.5 (15)                          |

| metabolite | statistic           | pooled     | males             | females                            |
|------------|---------------------|------------|-------------------|------------------------------------|
|            | $\beta_0$           | 0.0644     | 0.00316           | 0.127                              |
|            | $P_0$               | 0.0342     | 0.939             | 0.00511                            |
|            | bias ( $\beta_0$ )  | -0.000902  | -0.000382         | -0.00103                           |
| C8         | $\beta_{boot}$      |            |                   |                                    |
|            | $\mu(\beta)_{boot}$ | 0.0635     | 0.00278           | 0.126                              |
|            | $\mu(SE)_{boot}$    | 0.0305     | 0.0412            | 0.0453                             |
|            | $P_{boot}$          | 0.037      | 0.946             | 0.00548                            |
|            | % $P_{bonf.sign.}$  | 10.8       | 0.2               | 27.6                               |
|            | % $P_{nom.sign.}$   | 55.7       | 5.6               | 81.1                               |
|            | $\Delta$ Sex        | $P_{boot}$ | % $P_{nom.sign.}$ | $I^2_{boot}$ (% $I^2_{boot} = 0$ ) |
|            |                     | 0.0441     | 53.1              | 50.3 (14)                          |

| metabolite  | statistic           | pooled     | males   | females           |
|-------------|---------------------|------------|---------|-------------------|
|             | $\beta_0$           | 0.0557     | 0.129   | -0.0228           |
|             | $P_0$               | 0.0865     | 0.0048  | 0.618             |
|             | bias ( $\beta_0$ )  | 0.000661   | 0.00102 | 0.000452          |
| PC ae C36:2 | $\beta_{boot}$      |            |         |                   |
|             | $\mu(\beta)_{boot}$ | 0.0563     | 0.13    | -0.0223           |
|             | $\mu(SE)_{boot}$    | 0.0325     | 0.0458  | 0.0457            |
|             | $P_{boot}$          | 0.0828     | 0.00439 | 0.625             |
|             | % $P_{bonf.sign.}$  | 5          | 31.4    | 0                 |
|             | % $P_{nom.sign.}$   | 40.5       | 82.4    | 6.2               |
|             | $\Delta$ Sex        | $P_{boot}$ |         | % $P_{nom.sign.}$ |
|             | 0.0182              |            | 68.2    | 57.6 (7.9)        |

| metabolite | statistic           | pooled     | males    | females           |
|------------|---------------------|------------|----------|-------------------|
|            | $\beta_0$           | -0.0338    | 0.0325   | -0.105            |
|            | $P_0$               | 0.272      | 0.439    | 0.0197            |
|            | bias ( $\beta_0$ )  | 0.000196   | -0.00113 | 0.00152           |
| Histidine  | $\beta_{boot}$      |            |          |                   |
|            | $\mu(\beta)_{boot}$ | -0.0336    | 0.0314   | -0.103            |
|            | $\mu(SE)_{boot}$    | 0.0308     | 0.0422   | 0.0449            |
|            | $P_{boot}$          | 0.276      | 0.456    | 0.0212            |
|            | % $P_{bonf.sign.}$  | 1.7        | 0.1      | 17.8              |
|            | % $P_{nom.sign.}$   | 20.4       | 10.2     | 63.1              |
|            | $\Delta$ Sex        | $P_{boot}$ |          | % $P_{nom.sign.}$ |
|            | 0.0285              |            | 60.1     | 54.3 (11)         |

| metabolite | statistic           | pooled     | males     | females           |
|------------|---------------------|------------|-----------|-------------------|
|            | $\beta_0$           | 0.0336     | 0.107     | -0.0524           |
|            | $P_0$               | 0.284      | 0.0166    | 0.232             |
|            | bias ( $\beta_0$ )  | -0.000114  | -0.000374 | -9.01E-05         |
| Asparagine | $\beta_{boot}$      |            |           |                   |
|            | $\mu(\beta)_{boot}$ | 0.0335     | 0.107     | -0.0525           |
|            | $\mu(SE)_{boot}$    | 0.0314     | 0.0446    | 0.0439            |
|            | $P_{boot}$          | 0.286      | 0.017     | 0.231             |
|            | % $P_{bonf.sign.}$  | 1.1        | 17        | 1.5               |
|            | % $P_{nom.sign.}$   | 19.7       | 66.2      | 21.5              |
|            | $\Delta$ Sex        | $P_{boot}$ |           | % $P_{nom.sign.}$ |
|            | 0.011               |            | 71.5      | 60.7 (5.1)        |

| metabolite    | statistic           | pooled     | males   | females           |
|---------------|---------------------|------------|---------|-------------------|
|               | $\beta_0$           | 0.032      | 0.0909  | -0.0389           |
|               | $P_0$               | 0.31       | 0.0336  | 0.399             |
|               | bias ( $\beta_0$ )  | 0.000366   | 0.00102 | -0.000497         |
| SM (OH) C16:1 | $\beta_{boot}$      |            |         |                   |
|               | $\mu(\beta)_{boot}$ | 0.0323     | 0.092   | -0.0394           |
|               | $\mu(SE)_{boot}$    | 0.0315     | 0.0428  | 0.0461            |
|               | $P_{boot}$          | 0.304      | 0.0315  | 0.393             |
|               | % $P_{bonf.sign.}$  | 0.7        | 11.7    | 0.8               |
|               | % $P_{nom.sign.}$   | 18.4       | 59.2    | 11                |
|               | $\Delta$ Sex        | $P_{boot}$ |         | % $P_{nom.sign.}$ |
|               | 0.0365              |            | 57.2    | 52.2 (14)         |

| metabolite | statistic           | pooled     | males   | females           |                                    |
|------------|---------------------|------------|---------|-------------------|------------------------------------|
|            | $\beta_0$           | 0.0296     | 0.104   | -0.0256           |                                    |
|            | $P_0$               | 0.35       | 0.0394  | 0.523             |                                    |
|            | bias ( $\beta_0$ )  | -0.00114   | -0.0019 | -0.0013           |                                    |
| Glycine    | $\beta_{boot}$      |            |         |                   |                                    |
|            | $\mu(\beta)_{boot}$ | 0.0285     | 0.102   | -0.0269           |                                    |
|            | $\mu(SE)_{boot}$    | 0.0317     | 0.0506  | 0.0402            |                                    |
|            | $P_{boot}$          | 0.369      | 0.0428  | 0.503             |                                    |
|            | % $P_{bonf.sign.}$  | 1          | 10.5    | 0.7               |                                    |
|            | % $P_{nom.sign.}$   | 16.5       | 52.7    | 12.2              |                                    |
|            | $\Delta$ Sex        | $P_{boot}$ |         | % $P_{nom.sign.}$ | $I^2_{boot}$ (% $I^2_{boot} = 0$ ) |
|            |                     | 0.0447     |         | 50.6              | 50.2 (18)                          |

| metabolite  | statistic           | pooled     | males   | females           |                                    |
|-------------|---------------------|------------|---------|-------------------|------------------------------------|
|             | $\beta_0$           | 0.028      | 0.0883  | -0.0413           |                                    |
|             | $P_0$               | 0.368      | 0.0417  | 0.351             |                                    |
|             | bias ( $\beta_0$ )  | 0.000567   | 0.00219 | -0.00172          |                                    |
| PC ae C36:1 | $\beta_{boot}$      |            |         |                   |                                    |
|             | $\mu(\beta)_{boot}$ | 0.0285     | 0.0905  | -0.043            |                                    |
|             | $\mu(SE)_{boot}$    | 0.0311     | 0.0434  | 0.0444            |                                    |
|             | $P_{boot}$          | 0.359      | 0.0369  | 0.333             |                                    |
|             | % $P_{bonf.sign.}$  | 1.4        | 12.2    | 1.2               |                                    |
|             | % $P_{nom.sign.}$   | 15.4       | 54.3    | 16.8              |                                    |
|             | $\Delta$ Sex        | $P_{boot}$ |         | % $P_{nom.sign.}$ | $I^2_{boot}$ (% $I^2_{boot} = 0$ ) |
|             |                     | 0.0314     |         | 58.3              | 53.5 (13)                          |



| metabolite | statistic           | pooled     | males   | females           |
|------------|---------------------|------------|---------|-------------------|
|            | $\beta_0$           | 0.0155     | -0.054  | 0.0885            |
|            | $P_0$               | 0.585      | 0.167   | 0.0302            |
|            | bias ( $\beta_0$ )  | 0.00164    | 0.00196 | 0.00204           |
| C2         | $\beta_{boot}$      |            |         |                   |
|            | $\mu(\beta)_{boot}$ | 0.0171     | -0.0521 | 0.0906            |
|            | $\mu(SE)_{boot}$    | 0.0284     | 0.0391  | 0.0408            |
|            | $P_{boot}$          | 0.546      | 0.183   | 0.0265            |
|            | % $P_{bonf.sign.}$  | 0.5        | 2.6     | 11.4              |
|            | % $P_{nom.sign.}$   | 9          | 28      | 60.7              |
|            | $\Delta$ Sex        | $P_{boot}$ |         | % $P_{nom.sign.}$ |
|            | 0.0116              |            | 70.6    | 60.4 (5.4)        |

## FDG-PET

| metabolite  | statistic           | pooled     | males    | females           |
|-------------|---------------------|------------|----------|-------------------|
|             | $\beta_0$           | -0.127     | -0.14    | -0.11             |
|             | $P_0$               | 2.32E-05   | 0.000631 | 0.015             |
|             | bias ( $\beta_0$ )  | -0.00013   | 0.000483 | -0.00101          |
| PC aa C32:1 | $\beta_{boot}$      |            |          |                   |
|             | $\mu(\beta)_{boot}$ | -0.127     | -0.139   | -0.111            |
|             | $\mu(SE)_{boot}$    | 0.0299     | 0.0407   | 0.0449            |
|             | $P_{boot}$          | 2.08E-05   | 0.000621 | 0.0138            |
|             | % $P_{bonf.sign.}$  | 83.5       | 54.9     | 17.9              |
|             | % $P_{nom.sign.}$   | 99.2       | 93.8     | 69.6              |
|             | $\Delta$ Sex        | $P_{boot}$ |          | % $P_{nom.sign.}$ |
|             | 0.636               |            | 5.8      | 0 (63)            |

| metabolite  | statistic           | pooled     | males             | females                            |
|-------------|---------------------|------------|-------------------|------------------------------------|
|             | $\beta_0$           | -0.111     | -0.0974           | -0.141                             |
|             | $P_0$               | 0.000227   | 0.018             | 0.00184                            |
|             | bias ( $\beta_0$ )  | -0.00105   | -0.00203          | -0.000168                          |
| PC ae C44:4 | $\beta_{boot}$      |            |                   |                                    |
|             | $\mu(\beta)_{boot}$ | -0.112     | -0.0994           | -0.141                             |
|             | $\mu(SE)_{boot}$    | 0.0301     | 0.0411            | 0.0451                             |
|             | $P_{boot}$          | 0.000189   | 0.0155            | 0.00174                            |
|             | % $P_{bonf.sign.}$  | 67.5       | 17.6              | 41.6                               |
|             | % $P_{nom.sign.}$   | 96.8       | 69.9              | 89.3                               |
|             | $\Delta$ Sex        | $P_{boot}$ | % $P_{nom.sign.}$ | $I^2_{boot}$ (% $I^2_{boot} = 0$ ) |
|             | 0.492               | 10         | 0 (61)            |                                    |

| metabolite  | statistic           | pooled     | males             | females                            |
|-------------|---------------------|------------|-------------------|------------------------------------|
|             | $\beta_0$           | -0.105     | -0.112            | -0.111                             |
|             | $P_0$               | 0.000407   | 0.0058            | 0.013                              |
|             | bias ( $\beta_0$ )  | -0.0012    | -0.00169          | -0.000339                          |
| PC ae C44:5 | $\beta_{boot}$      |            |                   |                                    |
|             | $\mu(\beta)_{boot}$ | -0.106     | -0.114            | -0.111                             |
|             | $\mu(SE)_{boot}$    | 0.0296     | 0.0405            | 0.0444                             |
|             | $P_{boot}$          | 0.000335   | 0.005             | 0.0125                             |
|             | % $P_{bonf.sign.}$  | 62.3       | 29                | 19.1                               |
|             | % $P_{nom.sign.}$   | 96.8       | 82.4              | 71.7                               |
|             | $\Delta$ Sex        | $P_{boot}$ | % $P_{nom.sign.}$ | $I^2_{boot}$ (% $I^2_{boot} = 0$ ) |
|             | 0.967               | 2.7        | 0 (71)            |                                    |

| metabolite  | statistic           | pooled     | males             | females                            |
|-------------|---------------------|------------|-------------------|------------------------------------|
|             | $\beta_0$           | -0.107     | -0.125            | -0.0906                            |
|             | $P_0$               | 0.000685   | 0.00567           | 0.0425                             |
|             | bias ( $\beta_0$ )  | -0.00132   | 0.000661          | -0.00381                           |
| PC aa C32:0 | $\beta_{boot}$      |            |                   |                                    |
|             | $\mu(\beta)_{boot}$ | -0.109     | -0.125            | -0.0944                            |
|             | $\mu(SE)_{boot}$    | 0.0315     | 0.0451            | 0.0446                             |
|             | $P_{boot}$          | 0.000563   | 0.00577           | 0.0342                             |
|             | % $P_{bonf.sign.}$  | 54.6       | 26.1              | 10.3                               |
|             | % $P_{nom.sign.}$   | 94.8       | 82                | 56                                 |
|             | $\Delta$ Sex        | $P_{boot}$ | % $P_{nom.sign.}$ | $I^2_{boot}$ (% $I^2_{boot} = 0$ ) |
|             |                     | 0.635      | 5.2               | 0 (65)                             |

| metabolite  | statistic           | pooled     | males             | females                            |
|-------------|---------------------|------------|-------------------|------------------------------------|
|             | $\beta_0$           | -0.103     | -0.103            | -0.112                             |
|             | $P_0$               | 0.000856   | 0.0158            | 0.0133                             |
|             | bias ( $\beta_0$ )  | -0.00249   | -0.00367          | -0.00161                           |
| PC ae C42:4 | $\beta_{boot}$      |            |                   |                                    |
|             | $\mu(\beta)_{boot}$ | -0.105     | -0.106            | -0.114                             |
|             | $\mu(SE)_{boot}$    | 0.0308     | 0.0425            | 0.0454                             |
|             | $P_{boot}$          | 0.000623   | 0.0122            | 0.012                              |
|             | % $P_{bonf.sign.}$  | 53.2       | 20.5              | 19.2                               |
|             | % $P_{nom.sign.}$   | 93.4       | 69.3              | 72.4                               |
|             | $\Delta$ Sex        | $P_{boot}$ | % $P_{nom.sign.}$ | $I^2_{boot}$ (% $I^2_{boot} = 0$ ) |
|             |                     | 0.902      | 4.5               | 0 (69)                             |

| metabolite | statistic           | pooled     | males             | females                            |
|------------|---------------------|------------|-------------------|------------------------------------|
|            | $\beta_0$           | -0.103     | -0.165            | -0.0285                            |
|            | $P_0$               | 0.000909   | 9.64E-05          | 0.538                              |
|            | bias ( $\beta_0$ )  | -2.19E-05  | -0.000244         | 0.000573                           |
| C16:1      | $\beta_{boot}$      |            |                   |                                    |
|            | $\mu(\beta)_{boot}$ | -0.103     | -0.165            | -0.0279                            |
|            | $\mu(SE)_{boot}$    | 0.0309     | 0.0419            | 0.0463                             |
|            | $P_{boot}$          | 0.000879   | 8.44E-05          | 0.546                              |
|            | % $P_{bonf.sign.}$  | 49.9       | 72.4              | 0.3                                |
|            | % $P_{nom.sign.}$   | 92.6       | 98.2              | 11.6                               |
|            | $\Delta$ Sex        | $P_{boot}$ | % $P_{nom.sign.}$ | $I^2_{boot}$ (% $I^2_{boot} = 0$ ) |
|            |                     | 0.0284     | 57.5              | 54.4 (14)                          |

| metabolite  | statistic           | pooled     | males             | females                            |
|-------------|---------------------|------------|-------------------|------------------------------------|
|             | $\beta_0$           | -0.0529    | -0.119            | 0.016                              |
|             | $P_0$               | 0.0782     | 0.00434           | 0.715                              |
|             | bias ( $\beta_0$ )  | 0.000617   | 0.00174           | -0.000552                          |
| PC ae C40:2 | $\beta_{boot}$      |            |                   |                                    |
|             | $\mu(\beta)_{boot}$ | -0.0523    | -0.117            | 0.0154                             |
|             | $\mu(SE)_{boot}$    | 0.0301     | 0.0417            | 0.0438                             |
|             | $P_{boot}$          | 0.0818     | 0.00485           | 0.725                              |
|             | % $P_{bonf.sign.}$  | 5          | 29                | 0                                  |
|             | % $P_{nom.sign.}$   | 40.1       | 82                | 5.8                                |
|             | $\Delta$ Sex        | $P_{boot}$ | % $P_{nom.sign.}$ | $I^2_{boot}$ (% $I^2_{boot} = 0$ ) |
|             |                     | 0.0279     | 58.5              | 54.5 (9.6)                         |

| metabolite | statistic           | pooled     | males    | females           |
|------------|---------------------|------------|----------|-------------------|
|            | $\beta_0$           | -0.0234    | 0.0591   | -0.118            |
|            | $P_0$               | 0.451      | 0.177    | 0.00818           |
|            | bias ( $\beta_0$ )  | -0.00143   | -0.00103 | -0.00162          |
| Proline    | $\beta_{boot}$      |            |          |                   |
|            | $\mu(\beta)_{boot}$ | -0.0248    | 0.0581   | -0.119            |
|            | $\mu(SE)_{boot}$    | 0.031      | 0.0437   | 0.0443            |
|            | $P_{boot}$          | 0.424      | 0.184    | 0.00709           |
|            | % $P_{bonf.sign.}$  | 0.3        | 1.7      | 24.9              |
|            | % $P_{nom.sign.}$   | 10.7       | 25.5     | 78.9              |
|            | $\Delta$ Sex        | $P_{boot}$ |          | % $P_{nom.sign.}$ |
|            | 0.00432             |            | 80.4     | 65 (1.9)          |

## *APOE* $\epsilon 4$ status-stratified analyses

### Pathological CSF $A\beta_{1-42}$

| metabolite  | statistic                            | pooled     | <i>APOE</i> $\epsilon 4+$ | <i>APOE</i> $\epsilon 4-$ |
|-------------|--------------------------------------|------------|---------------------------|---------------------------|
|             | $\beta_0$                            | 0.283      | 0.63                      | 0.158                     |
|             | $P_0$                                | 0.000258   | 2.5E-05                   | 0.0796                    |
|             | bias ( $\beta_0$ )                   | 0.00486    | 0.00984                   | 0.00611                   |
| PC ae C44:6 | $\beta_{boot}$                       |            |                           |                           |
|             | $\mu(\beta)_{boot}$                  | 0.288      | 0.64                      | 0.164                     |
|             | $\mu(SE)_{boot}$                     | 0.0783     | 0.153                     | 0.0914                    |
|             | $P_{boot}$                           | 0.000233   | 2.85E-05                  | 0.0724                    |
|             | % $P_{bonf.sign.}$                   | 63.9       | 81.4                      | 5                         |
|             | % $P_{nom.sign.}$                    | 95.6       | 99.6                      | 44                        |
|             | $\Delta$ <i>APOE</i> $\epsilon 4\pm$ | $P_{boot}$ |                           | % $P_{nom.sign.}$         |
|             | 0.00791                              |            | 76.1                      | 62.3 (4)                  |

| metabolite  | statistic                            | pooled     | <i>APOE</i> $\epsilon 4+$ | <i>APOE</i> $\epsilon 4-$ |
|-------------|--------------------------------------|------------|---------------------------|---------------------------|
|             | $\beta_0$                            | 0.265      | 0.565                     | 0.139                     |
|             | $P_0$                                | 0.000457   | 0.00013                   | 0.113                     |
|             | bias ( $\beta_0$ )                   | 0.00664    | 0.011                     | 0.00656                   |
| PC ae C44:4 | $\beta_{boot}$                       |            |                           |                           |
|             | $\mu(\beta)_{boot}$                  | 0.272      | 0.577                     | 0.146                     |
|             | $\mu(SE)_{boot}$                     | 0.0765     | 0.151                     | 0.0893                    |
|             | $P_{boot}$                           | 0.000378   | 0.000137                  | 0.102                     |
|             | % $P_{bonf.sign.}$                   | 60.8       | 69.9                      | 3.4                       |
|             | % $P_{nom.sign.}$                    | 94.8       | 98.1                      | 37.3                      |
|             | $\Delta$ <i>APOE</i> $\epsilon 4\pm$ | $P_{boot}$ |                           | % $P_{nom.sign.}$         |
|             | 0.0148                               |            | 67.2                      | 59 (6.1)                  |

| metabolite  | statistic                            | pooled     | <i>APOE</i> $\epsilon 4+$ | <i>APOE</i> $\epsilon 4-$ |
|-------------|--------------------------------------|------------|---------------------------|---------------------------|
|             | $\beta_0$                            | 0.26       | 0.609                     | 0.129                     |
|             | $P_0$                                | 0.000523   | 2.64E-05                  | 0.137                     |
|             | bias ( $\beta_0$ )                   | 0.00113    | 0.00849                   | 0.000964                  |
| PC ae C44:5 | $\beta_{boot}$                       |            |                           |                           |
|             | $\mu(\beta)_{boot}$                  | 0.261      | 0.618                     | 0.13                      |
|             | $\mu(SE)_{boot}$                     | 0.0758     | 0.148                     | 0.0884                    |
|             | $P_{boot}$                           | 0.000567   | 3.18E-05                  | 0.14                      |
|             | % $P_{bonf.sign.}$                   | 55.4       | 82                        | 2.9                       |
|             | % $P_{nom.sign.}$                    | 93.4       | 99.5                      | 31.1                      |
|             | $\Delta$ <i>APOE</i> $\epsilon 4\pm$ | $P_{boot}$ |                           | % $P_{nom.sign.}$         |
|             | 0.00504                              |            | 81.7                      | 64.3 (1.9)                |

| metabolite  | statistic                            | pooled     | <i>APOE</i> $\epsilon 4+$ | <i>APOE</i> $\epsilon 4-$          |  |
|-------------|--------------------------------------|------------|---------------------------|------------------------------------|--|
|             | $\beta_0$                            | 0.242      | 0.564                     | 0.114                              |  |
|             | $P_0$                                | 0.00198    | 0.000132                  | 0.215                              |  |
|             | bias ( $\beta_0$ )                   | 0.000364   | 0.00878                   | -0.00137                           |  |
| PC ae C42:4 |                                      |            |                           |                                    |  |
|             | $\mu(\beta)_{boot}$                  | 0.242      | 0.573                     | 0.113                              |  |
|             | $\mu(SE)_{boot}$                     | 0.0788     | 0.151                     | 0.0931                             |  |
|             | $P_{boot}$                           | 0.00214    | 0.000147                  | 0.227                              |  |
|             | % $P_{bonf.sign.}$                   | 38.5       | 70                        | 1.6                                |  |
|             | % $P_{nom.sign.}$                    | 88.3       | 98.1                      | 22.8                               |  |
|             | $\Delta$ <i>APOE</i> $\epsilon 4\pm$ | $P_{boot}$ | % $P_{nom.sign.}$         | $I^2_{boot}$ (% $I^2_{boot} = 0$ ) |  |
|             |                                      | 0.00975    | 74.9                      | 61.3 (3.9)                         |  |

| metabolite | statistic                            | pooled     | <i>APOE</i> $\epsilon 4+$ | <i>APOE</i> $\epsilon 4-$          |  |
|------------|--------------------------------------|------------|---------------------------|------------------------------------|--|
|            | $\beta_0$                            | -0.0755    | 0.176                     | -0.202                             |  |
|            | $P_0$                                | 0.352      | 0.215                     | 0.044                              |  |
|            | bias ( $\beta_0$ )                   | -0.0019    | -0.00185                  | -0.00142                           |  |
| Proline    |                                      |            |                           |                                    |  |
|            | $\mu(\beta)_{boot}$                  | -0.0774    | 0.174                     | -0.203                             |  |
|            | $\mu(SE)_{boot}$                     | 0.0819     | 0.145                     | 0.102                              |  |
|            | $P_{boot}$                           | 0.345      | 0.231                     | 0.0455                             |  |
|            | % $P_{bonf.sign.}$                   | 0.7        | 1.9                       | 7.3                                |  |
|            | % $P_{nom.sign.}$                    | 14.7       | 21.9                      | 51.1                               |  |
|            | $\Delta$ <i>APOE</i> $\epsilon 4\pm$ | $P_{boot}$ | % $P_{nom.sign.}$         | $I^2_{boot}$ (% $I^2_{boot} = 0$ ) |  |
|            |                                      | 0.0341     | 57.3                      | 52.8 (12)                          |  |

| metabolite | statistic                            | pooled     | <i>APOE</i> $\epsilon 4+$ | <i>APOE</i> $\epsilon 4-$          |
|------------|--------------------------------------|------------|---------------------------|------------------------------------|
|            | $\beta_0$                            | 0.0603     | 0.363                     | -0.102                             |
|            | $P_0$                                | 0.46       | 0.0183                    | 0.305                              |
|            | bias ( $\beta_0$ )                   | 0.000846   | 0.0135                    | -0.00342                           |
| Glycine    | $\beta_{boot}$                       |            |                           |                                    |
|            | $\mu(\beta)_{boot}$                  | 0.0612     | 0.376                     | -0.106                             |
|            | $\mu(SE)_{boot}$                     | 0.0823     | 0.157                     | 0.101                              |
|            | $P_{boot}$                           | 0.457      | 0.0164                    | 0.296                              |
|            | % $P_{bonf.sign.}$                   | 0.3        | 15.7                      | 1.1                                |
|            | % $P_{nom.sign.}$                    | 12.5       | 69.2                      | 20.4                               |
|            | $\Delta$ <i>APOE</i> $\epsilon 4\pm$ | $P_{boot}$ | % $P_{nom.sign.}$         | $I^2_{boot}$ (% $I^2_{boot} = 0$ ) |
|            |                                      | 0.0104     | 72.8                      | 61 (6.8)                           |

## FDG-PET

| metabolite  | statistic                            | pooled     | <i>APOE</i> $\epsilon 4+$ | <i>APOE</i> $\epsilon 4-$          |
|-------------|--------------------------------------|------------|---------------------------|------------------------------------|
|             | $\beta_0$                            | -0.127     | -0.0873                   | -0.162                             |
|             | $P_0$                                | 2.32E-05   | 0.0535                    | 0.000134                           |
|             | bias ( $\beta_0$ )                   | -0.00013   | -0.00142                  | 0.000826                           |
| PC aa C32:1 | $\beta_{boot}$                       |            |                           |                                    |
|             | $\mu(\beta)_{boot}$                  | -0.127     | -0.0887                   | -0.161                             |
|             | $\mu(SE)_{boot}$                     | 0.0299     | 0.0452                    | 0.0421                             |
|             | $P_{boot}$                           | 2.08E-05   | 0.0495                    | 0.000131                           |
|             | % $P_{bonf.sign.}$                   | 83.5       | 9.5                       | 70.7                               |
|             | % $P_{nom.sign.}$                    | 99.2       | 50.3                      | 97.5                               |
|             | $\Delta$ <i>APOE</i> $\epsilon 4\pm$ | $P_{boot}$ | % $P_{nom.sign.}$         | $I^2_{boot}$ (% $I^2_{boot} = 0$ ) |
|             |                                      | 0.241      | 19.2                      | 14.8 (42)                          |



| metabolite  | statistic                            | pooled     | <i>APOE</i> $\epsilon 4+$ | <i>APOE</i> $\epsilon 4-$          |
|-------------|--------------------------------------|------------|---------------------------|------------------------------------|
|             | $\beta_0$                            | -0.111     | -0.115                    | -0.114                             |
|             | $P_0$                                | 0.000227   | 0.0139                    | 0.00634                            |
|             | bias ( $\beta_0$ )                   | -0.00105   | -0.000257                 | -0.00172                           |
| PC ae C44:4 | $\beta_{boot}$                       |            |                           |                                    |
|             | $\mu(\beta)_{boot}$                  | -0.112     | -0.115                    | -0.115                             |
|             | $\mu(SE)_{boot}$                     | 0.0301     | 0.0466                    | 0.0415                             |
|             | $P_{boot}$                           | 0.000189   | 0.0134                    | 0.00549                            |
|             | % $P_{bonf.sign.}$                   | 67.5       | 20.6                      | 26.3                               |
|             | % $P_{nom.sign.}$                    | 96.8       | 70.1                      | 81                                 |
|             | $\Delta$ <i>APOE</i> $\epsilon 4\pm$ | $P_{boot}$ | % $P_{nom.sign.}$         | $I^2_{boot}$ (% $I^2_{boot} = 0$ ) |
|             | 1                                    | 4.6        | 0 (70)                    |                                    |

| metabolite  | statistic                            | pooled     | <i>APOE</i> $\epsilon 4+$ | <i>APOE</i> $\epsilon 4-$          |
|-------------|--------------------------------------|------------|---------------------------|------------------------------------|
|             | $\beta_0$                            | -0.105     | -0.122                    | -0.102                             |
|             | $P_0$                                | 0.000407   | 0.00834                   | 0.013                              |
|             | bias ( $\beta_0$ )                   | -0.0012    | -0.00222                  | -0.000556                          |
| PC ae C44:5 | $\beta_{boot}$                       |            |                           |                                    |
|             | $\mu(\beta)_{boot}$                  | -0.106     | -0.124                    | -0.102                             |
|             | $\mu(SE)_{boot}$                     | 0.0296     | 0.046                     | 0.0408                             |
|             | $P_{boot}$                           | 0.000335   | 0.00712                   | 0.0123                             |
|             | % $P_{bonf.sign.}$                   | 62.3       | 24.1                      | 17.1                               |
|             | % $P_{nom.sign.}$                    | 96.8       | 76.8                      | 73.6                               |
|             | $\Delta$ <i>APOE</i> $\epsilon 4\pm$ | $P_{boot}$ | % $P_{nom.sign.}$         | $I^2_{boot}$ (% $I^2_{boot} = 0$ ) |
|             | 0.724                                | 4.4        | 0 (69)                    |                                    |

| metabolite  | statistic                            | pooled     | <i>APOE</i> $\epsilon 4+$ | <i>APOE</i> $\epsilon 4-$          |
|-------------|--------------------------------------|------------|---------------------------|------------------------------------|
|             | $\beta_0$                            | -0.107     | -0.135                    | -0.0823                            |
|             | $P_0$                                | 0.000685   | 0.00439                   | 0.0658                             |
|             | bias ( $\beta_0$ )                   | -0.00132   | -0.00386                  | 0.000352                           |
| PC aa C32:0 | $\beta_{boot}$                       |            |                           |                                    |
|             | $\mu(\beta)_{boot}$                  | -0.109     | -0.139                    | -0.0819                            |
|             | $\mu(SE)_{boot}$                     | 0.0315     | 0.0474                    | 0.0446                             |
|             | $P_{boot}$                           | 0.000563   | 0.0033                    | 0.0664                             |
|             | % $P_{bonf.sign.}$                   | 54.6       | 34.2                      | 5.3                                |
|             | % $P_{nom.sign.}$                    | 94.8       | 83.7                      | 43.6                               |
|             | $\Delta$ <i>APOE</i> $\epsilon 4\pm$ | $P_{boot}$ | % $P_{nom.sign.}$         | $I^2_{boot}$ (% $I^2_{boot} = 0$ ) |
|             | 0.378                                | 14.1       | 0 (53)                    |                                    |

| metabolite  | statistic                            | pooled     | <i>APOE</i> $\epsilon 4+$ | <i>APOE</i> $\epsilon 4-$          |
|-------------|--------------------------------------|------------|---------------------------|------------------------------------|
|             | $\beta_0$                            | -0.103     | -0.131                    | -0.0859                            |
|             | $P_0$                                | 0.000856   | 0.00579                   | 0.0451                             |
|             | bias ( $\beta_0$ )                   | -0.00249   | -0.00038                  | -0.00426                           |
| PC ae C42:4 | $\beta_{boot}$                       |            |                           |                                    |
|             | $\mu(\beta)_{boot}$                  | -0.105     | -0.131                    | -0.0901                            |
|             | $\mu(SE)_{boot}$                     | 0.0308     | 0.0472                    | 0.0429                             |
|             | $P_{boot}$                           | 0.000623   | 0.00553                   | 0.0355                             |
|             | % $P_{bonf.sign.}$                   | 53.2       | 29.4                      | 9.1                                |
|             | % $P_{nom.sign.}$                    | 93.4       | 78.3                      | 56.6                               |
|             | $\Delta$ <i>APOE</i> $\epsilon 4\pm$ | $P_{boot}$ | % $P_{nom.sign.}$         | $I^2_{boot}$ (% $I^2_{boot} = 0$ ) |
|             | 0.522                                | 9.5        | 0 (60)                    |                                    |

| metabolite | statistic                            | pooled                  | <i>APOE</i> $\epsilon 4+$                    | <i>APOE</i> $\epsilon 4-$                    |        |
|------------|--------------------------------------|-------------------------|----------------------------------------------|----------------------------------------------|--------|
|            | $\beta_0$                            | -0.0573                 | 0.0373                                       | -0.135                                       |        |
|            | $P_0$                                | 0.0514                  | 0.417                                        | 0.000717                                     |        |
|            | bias ( $\beta_0$ )                   | -0.0007                 | -0.000221                                    | -0.000571                                    |        |
| C10        |                                      | $\beta_{boot}$ [pooled] | $\beta_{boot}$ [ <i>APOE</i> $\epsilon 4+$ ] | $\beta_{boot}$ [ <i>APOE</i> $\epsilon 4-$ ] |        |
|            |                                      | $\mu(\beta)_{boot}$     | -0.058                                       | 0.0371                                       | -0.136 |
|            |                                      | $\mu(SE)_{boot}$        | 0.0294                                       | 0.0461                                       | 0.0399 |
|            | $P_{boot}$                           | 0.0486                  | 0.421                                        | 0.000655                                     |        |
|            | % $P_{bonf.sign.}$                   | 9.2                     | 0                                            | 53.5                                         |        |
|            | % $P_{nom.sign.}$                    | 50.7                    | 10.1                                         | 93.4                                         |        |
|            | $\Delta$ <i>APOE</i> $\epsilon 4\pm$ | $P_{boot}$              | % $P_{nom.sign.}$                            | $I^2_{boot}$ (% $I^2_{boot} = 0$ )           |        |
|            |                                      | 0.00447                 | 83.1                                         | 64.8 (3.3)                                   |        |

| metabolite | statistic                            | pooled                  | <i>APOE</i> $\epsilon 4+$                    | <i>APOE</i> $\epsilon 4-$                    |        |
|------------|--------------------------------------|-------------------------|----------------------------------------------|----------------------------------------------|--------|
|            | $\beta_0$                            | -0.0505                 | 0.0381                                       | -0.138                                       |        |
|            | $P_0$                                | 0.0996                  | 0.404                                        | 0.00158                                      |        |
|            | bias ( $\beta_0$ )                   | -0.00134                | -0.00293                                     | 7.96E-05                                     |        |
| C8         |                                      | $\beta_{boot}$ [pooled] | $\beta_{boot}$ [ <i>APOE</i> $\epsilon 4+$ ] | $\beta_{boot}$ [ <i>APOE</i> $\epsilon 4-$ ] |        |
|            |                                      | $\mu(\beta)_{boot}$     | -0.0519                                      | 0.0351                                       | -0.138 |
|            |                                      | $\mu(SE)_{boot}$        | 0.0306                                       | 0.0456                                       | 0.0435 |
|            | $P_{boot}$                           | 0.0907                  | 0.441                                        | 0.00154                                      |        |
|            | % $P_{bonf.sign.}$                   | 3.9                     | 0.3                                          | 44.5                                         |        |
|            | % $P_{nom.sign.}$                    | 38.7                    | 11.1                                         | 89.2                                         |        |
|            | $\Delta$ <i>APOE</i> $\epsilon 4\pm$ | $P_{boot}$              | % $P_{nom.sign.}$                            | $I^2_{boot}$ (% $I^2_{boot} = 0$ )           |        |
|            |                                      | 0.00602                 | 79.1                                         | 63.6 (3.7)                                   |        |

| metabolite | statistic                            | pooled                                                                            | <i>APOE</i> $\epsilon 4+$                                                          | <i>APOE</i> $\epsilon 4-$                                                           |
|------------|--------------------------------------|-----------------------------------------------------------------------------------|------------------------------------------------------------------------------------|-------------------------------------------------------------------------------------|
|            | $\beta_0$                            | 0.0364                                                                            | -0.0397                                                                            | 0.106                                                                               |
|            | $P_0$                                | 0.249                                                                             | 0.408                                                                              | 0.0168                                                                              |
|            | bias ( $\beta_0$ )                   | -0.000386                                                                         | -0.00077                                                                           | 8.57E-05                                                                            |
|            | $\beta_{boot}$                       | 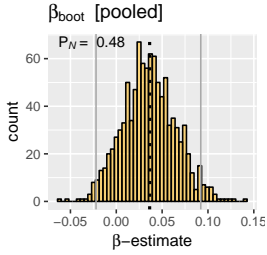 |  |  |
| Valine     | $\mu(\beta)_{boot}$                  | 0.036                                                                             | -0.0405                                                                            | 0.106                                                                               |
|            | $\mu(SE)_{boot}$                     | 0.0315                                                                            | 0.0479                                                                             | 0.0442                                                                              |
|            | $P_{boot}$                           | 0.254                                                                             | 0.398                                                                              | 0.0165                                                                              |
|            | % $P_{bonf.sign.}$                   | 1.1                                                                               | 0.5                                                                                | 16.5                                                                                |
|            | % $P_{nom.sign.}$                    | 18.8                                                                              | 12.9                                                                               | 67.1                                                                                |
|            | $\Delta$ <i>APOE</i> $\epsilon 4\pm$ | $P_{boot}$                                                                        | 0.0245                                                                             | % $P_{nom.sign.}$                                                                   |
|            |                                      |                                                                                   | 62.4                                                                               | 55.5 (10)                                                                           |

| metabolite | statistic                            | pooled                                                                              | <i>APOE</i> $\epsilon 4+$                                                            | <i>APOE</i> $\epsilon 4-$                                                             |
|------------|--------------------------------------|-------------------------------------------------------------------------------------|--------------------------------------------------------------------------------------|---------------------------------------------------------------------------------------|
|            | $\beta_0$                            | -0.0325                                                                             | -0.14                                                                                | 0.059                                                                                 |
|            | $P_0$                                | 0.3                                                                                 | 0.00305                                                                              | 0.18                                                                                  |
|            | bias ( $\beta_0$ )                   | -0.000904                                                                           | -0.00172                                                                             | -0.000546                                                                             |
|            | $\beta_{boot}$                       | 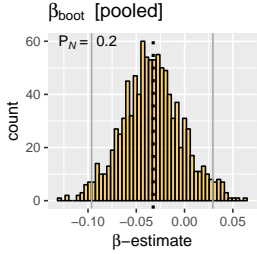 |  |  |
| Glycine    | $\mu(\beta)_{boot}$                  | -0.0334                                                                             | -0.142                                                                               | 0.0585                                                                                |
|            | $\mu(SE)_{boot}$                     | 0.0313                                                                              | 0.047                                                                                | 0.044                                                                                 |
|            | $P_{boot}$                           | 0.286                                                                               | 0.0026                                                                               | 0.184                                                                                 |
|            | % $P_{bonf.sign.}$                   | 1                                                                                   | 37.3                                                                                 | 2.6                                                                                   |
|            | % $P_{nom.sign.}$                    | 17.7                                                                                | 86.2                                                                                 | 26.2                                                                                  |
|            | $\Delta$ <i>APOE</i> $\epsilon 4\pm$ | $P_{boot}$                                                                          | 0.00187                                                                              | % $P_{nom.sign.}$                                                                     |
|            |                                      |                                                                                     | 88.1                                                                                 | 67.8 (1.9)                                                                            |

| metabolite | statistic                            | pooled     | <i>APOE</i> $\epsilon 4+$ | <i>APOE</i> $\epsilon 4-$          |
|------------|--------------------------------------|------------|---------------------------|------------------------------------|
|            | $\beta_0$                            | -0.0234    | -0.1                      | 0.0481                             |
|            | $P_0$                                | 0.451      | 0.0339                    | 0.264                              |
|            | bias ( $\beta_0$ )                   | -0.00143   | -0.0019                   | -0.00158                           |
| Proline    | $\beta_{boot}$                       |            |                           |                                    |
|            | $\mu(\beta)_{boot}$                  | -0.0248    | -0.102                    | 0.0465                             |
|            | $\mu(SE)_{boot}$                     | 0.031      | 0.0473                    | 0.0431                             |
|            | $P_{boot}$                           | 0.424      | 0.0303                    | 0.28                               |
|            | % $P_{bonf.sign.}$                   | 0.3        | 12.7                      | 0.7                                |
|            | % $P_{nom.sign.}$                    | 10.7       | 57.1                      | 18.8                               |
|            | $\Delta$ <i>APOE</i> $\epsilon 4\pm$ | $P_{boot}$ | % $P_{nom.sign.}$         | $I^2_{boot}$ (% $I^2_{boot} = 0$ ) |
|            |                                      | 0.0199     | 64                        | 57.1 (8.4)                         |

## 2-fold stratified analyses (sex \* *APOE* $\epsilon 4$ status)

### Pathological CSF $A\beta_{1-42}$

| metabolite  | statistic           | <i>APOE</i> $\epsilon 4+$ males | <i>APOE</i> $\epsilon 4+$ females | <i>APOE</i> $\epsilon 4-$ males | <i>APOE</i> $\epsilon 4-$ females |
|-------------|---------------------|---------------------------------|-----------------------------------|---------------------------------|-----------------------------------|
|             | $\beta_0$           | 0.463                           | 0.922                             | 0.192                           | 0.0998                            |
|             | $P_0$               | 0.0168                          | 0.00019                           | 0.103                           | 0.481                             |
|             | bias ( $\beta_0$ )  | 0.0267                          | 0.057                             | 0.0054                          | -0.00329                          |
| PC ae C44:6 | $\beta_{boot}$      |                                 |                                   |                                 |                                   |
|             | $\mu(\beta)_{boot}$ | 0.49                            | 0.979                             | 0.197                           | 0.0965                            |
|             | $\mu(SE)_{boot}$    | 0.201                           | 0.263                             | 0.121                           | 0.145                             |
|             | $P_{boot}$          | 0.015                           | 0.000204                          | 0.103                           | 0.505                             |
|             | % $P_{bonf.sign.}$  | 16                              | 68.8                              | 4                               | 0.1                               |
|             | % $P_{nom.sign.}$   | 70                              | 97.4                              | 36.7                            | 8.9                               |

| metabolite  | statistic           | <i>APOE</i> $\epsilon$ 4+ males                                                   | <i>APOE</i> $\epsilon$ 4+ females                                                 | <i>APOE</i> $\epsilon$ 4- males                                                    | <i>APOE</i> $\epsilon$ 4- females                                                   |
|-------------|---------------------|-----------------------------------------------------------------------------------|-----------------------------------------------------------------------------------|------------------------------------------------------------------------------------|-------------------------------------------------------------------------------------|
|             | $\beta_0$           | 0.521                                                                             | 0.761                                                                             | 0.197                                                                              | 0.0223                                                                              |
|             | $P_0$               | 0.00617                                                                           | 0.000829                                                                          | 0.0879                                                                             | 0.87                                                                                |
|             | bias ( $\beta_0$ )  | 0.024                                                                             | 0.031                                                                             | 0.00801                                                                            | -0.0084                                                                             |
| PC ae C44:5 | $\beta_{boot}$      | 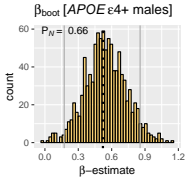 |  |  |  |
|             | $\mu(\beta)_{boot}$ | 0.545                                                                             | 0.792                                                                             | 0.205                                                                              | 0.0139                                                                              |
|             | $\mu(SE)_{boot}$    | 0.198                                                                             | 0.239                                                                             | 0.117                                                                              | 0.14                                                                                |
|             | $P_{boot}$          | 0.00579                                                                           | 0.000945                                                                          | 0.0815                                                                             | 0.921                                                                               |
|             | % $P_{bonf.sign.}$  | 25.7                                                                              | 50.3                                                                              | 5.1                                                                                | 0.1                                                                                 |
|             | % $P_{nom.sign.}$   | 81.9                                                                              | 93.8                                                                              | 40.9                                                                               | 4.2                                                                                 |

| metabolite  | statistic           | <i>APOE</i> $\epsilon$ 4+ males                                                    | <i>APOE</i> $\epsilon$ 4+ females                                                  | <i>APOE</i> $\epsilon$ 4- males                                                     | <i>APOE</i> $\epsilon$ 4- females                                                    |
|-------------|---------------------|------------------------------------------------------------------------------------|------------------------------------------------------------------------------------|-------------------------------------------------------------------------------------|--------------------------------------------------------------------------------------|
|             | $\beta_0$           | 0.42                                                                               | 0.761                                                                              | 0.194                                                                               | -0.00631                                                                             |
|             | $P_0$               | 0.0315                                                                             | 0.000865                                                                           | 0.106                                                                               | 0.965                                                                                |
|             | bias ( $\beta_0$ )  | 0.0212                                                                             | 0.0315                                                                             | -0.0058                                                                             | 0.000854                                                                             |
| PC ae C42:4 | $\beta_{boot}$      | 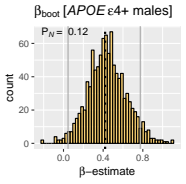 |  |  |  |
|             | $\mu(\beta)_{boot}$ | 0.441                                                                              | 0.793                                                                              | 0.189                                                                               | -0.00546                                                                             |
|             | $\mu(SE)_{boot}$    | 0.202                                                                              | 0.241                                                                              | 0.123                                                                               | 0.149                                                                                |
|             | $P_{boot}$          | 0.0293                                                                             | 0.000977                                                                           | 0.124                                                                               | 0.971                                                                                |
|             | % $P_{bonf.sign.}$  | 9                                                                                  | 50.9                                                                               | 2.2                                                                                 | 0                                                                                    |
|             | % $P_{nom.sign.}$   | 58.9                                                                               | 94.7                                                                               | 34.4                                                                                | 4.4                                                                                  |

## CSF p-tau

| metabolite | statistic           | <i>APOE</i> $\epsilon$ 4+ males                                                     | <i>APOE</i> $\epsilon$ 4+ females                                                   | <i>APOE</i> $\epsilon$ 4- males                                                      | <i>APOE</i> $\epsilon$ 4- females                                                     |
|------------|---------------------|-------------------------------------------------------------------------------------|-------------------------------------------------------------------------------------|--------------------------------------------------------------------------------------|---------------------------------------------------------------------------------------|
|            | $\beta_0$           | -0.0642                                                                             | 0.264                                                                               | 0.0635                                                                               | 0.0746                                                                                |
|            | $P_0$               | 0.324                                                                               | 0.000121                                                                            | 0.278                                                                                | 0.23                                                                                  |
|            | bias ( $\beta_0$ )  | 0.00401                                                                             | -0.00236                                                                            | -0.00472                                                                             | 0.00132                                                                               |
| C10        | $\beta_{boot}$      | 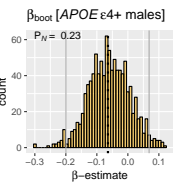 |  |  |  |
|            | $\mu(\beta)_{boot}$ | -0.0602                                                                             | 0.262                                                                               | 0.0588                                                                               | 0.0759                                                                                |
|            | $\mu(SE)_{boot}$    | 0.0656                                                                              | 0.0682                                                                              | 0.0585                                                                               | 0.0623                                                                                |
|            | $P_{boot}$          | 0.359                                                                               | 0.000121                                                                            | 0.315                                                                                | 0.223                                                                                 |
|            | % $P_{bonf.sign.}$  | 1.2                                                                                 | 69.7                                                                                | 2                                                                                    | 1.1                                                                                   |
|            | % $P_{nom.sign.}$   | 14.7                                                                                | 97.5                                                                                | 19.7                                                                                 | 19.3                                                                                  |

# FDG-PET

| metabolite | statistic           | <i>APOE</i> $\epsilon$ 4+ males                                                   | <i>APOE</i> $\epsilon$ 4+ females                                                 | <i>APOE</i> $\epsilon$ 4- males                                                    | <i>APOE</i> $\epsilon$ 4- females                                                   |
|------------|---------------------|-----------------------------------------------------------------------------------|-----------------------------------------------------------------------------------|------------------------------------------------------------------------------------|-------------------------------------------------------------------------------------|
|            | $\beta_0$           | 0.0464                                                                            | -0.272                                                                            | 0.082                                                                              | 0.0132                                                                              |
|            | $P_0$               | 0.476                                                                             | 8.22E-05                                                                          | 0.185                                                                              | 0.829                                                                               |
|            | bias ( $\beta_0$ )  | -0.00307                                                                          | -0.00254                                                                          | 0.000889                                                                           | -0.00121                                                                            |
| Proline    | $\beta_{boot}$      | 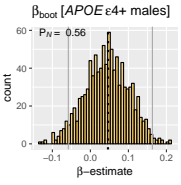 |  |  |  |
|            | $\mu(\beta)_{boot}$ | 0.0433                                                                            | -0.274                                                                            | 0.0829                                                                             | 0.012                                                                               |
|            | $\mu(SE)_{boot}$    | 0.0652                                                                            | 0.0683                                                                            | 0.0618                                                                             | 0.0615                                                                              |
|            | $P_{boot}$          | 0.506                                                                             | 6.04E-05                                                                          | 0.179                                                                              | 0.845                                                                               |
|            | % $P_{bonf.sign.}$  | 0                                                                                 | 74.1                                                                              | 1.6                                                                                | 0.1                                                                                 |
|            | % $P_{nom.sign.}$   | 7.7                                                                               | 98.1                                                                              | 25.7                                                                               | 4.3                                                                                 |
